# Supplementary material for: Mechanism of Unusual Isosymmetric Order-Disorder Phase Transition in [Dimethylhydrazinium]Mn(HCOO)3 Hybrid Perovskite Probed by Vibrational Spectroscopy
Source: MDPI journal article supplement (doi:10.3390/ma14143984), 2021-07-16
Supplement: s1 [file s1]

# Mechanism of Unusual Isosymmetric Order-Disorder Phase Transition in [Dimethylhydrazinium]Mn(HCOO)<sub>3</sub> Hybrid Perovskite Probed by Vibrational Spectroscopy

Jan Albert Zienkiewicz, Edyta Kucharska and Maciej Ptak

**Table S1.** Selected calculated and experimental bond lengths (Å) and bond angles (°) of dimethylhydrazinium cation (DMHy<sup>+</sup>) compared to calculated values obtained for dimethylhydrazine molecule (DMHy).

| Bond length / angle | DMHy <sup>+</sup> cation |                                    | DMHy molecule       |            |
|---------------------|--------------------------|------------------------------------|---------------------|------------|
|                     | Calculated               | Experimental (300 K, 100 K)<br>[1] | Bond length / angle | Calculated |
| N1–N4               | 1.450                    | 1.4268 (34), 1.4475 (34)           | N1–N4               | 1.431      |
| N1–H2               | 1.017                    | 0.8899 (35)-0.8903 (27),           | N1–H2               | 1.013      |
| N1–H3               | 1.017                    | 0.9852 (28)-1.0008 (25)            | N1–H3               | 1.024      |
| N4–C5               | 1.504                    | 1.4766 (34), 1.4897 (42)           | N4–C5               | 1.456      |
| N4–C10              | 1.503                    | 1.4722 (44), 1.4878 (40)           | N4–C9               | 1.455      |
| N4–H9               | 1.021                    | 0.9781 (18), 0.9802 (25)           |                     |            |
| C5–H6               | 1.086                    | 0.9597 (30)-0.9601 (28),           | C5–H6               | 1.090      |
| C5–H7               | 1.087                    | 0.9595 (31)-0.9603 (34)            | C5–H7               | 1.091      |
| C5–H8               | 1.086                    |                                    | C5–H8               | 1.105      |
| C10–H10             | 1.087                    | 0.9593 (38)-0.9604 (41),           | C9–H10              | 1.103      |
| C10–H11             | 1.086                    | 0.9594 (27)-0.9603 (29)            | C9–H11              | 1.090      |
| C10–H12             | 1.085                    |                                    | C9–H12              | 1.087      |
| N1–N4–C5            | 115.46                   | 110.966 (218)-112.655 (238),       | N1–N4–C5            | 112.51     |
| N1–N4–C10           | 108.69                   | 109.041 (215)-114.215 (227)        | N1–N4–C9            | 108.53     |
| C5–N4–C10           | 112.70                   | 110.984 (219), 111.226 (233)       | C5–N4–C9            | 111.99     |
| N4–N1–H2            | 107.90                   | 109.445 (311)-109.528 (319),       | N4–N1–H2            | 107.38     |
| N4–N1–H3            | 107.29                   | 102.431 (219)-111.051 (226)        | N4–N1–H3            | 109.99     |
| N4–C5–H6            | 108.58                   | 109.453 (246)-109.485 (246),       | N4–C5–H6            | 109.61     |
| N4–C5–H7            | 108.85                   | 109.473 (246)-109.510 (322)        | N4–C5–H7            | 109.88     |
| N4–C5–H8            | 108.19                   |                                    | N4–C5–H8            | 112.49     |
| N4–C10–H10          | 110.62                   | 109.437 (281)-109.506 (258),       | N4–C9–H10           | 108.47     |
| N4–C10–H11          | 108.53                   | 109.447 (258)-109.498 (254)        | N4–C9–H11           | 109.42     |
| N4–C10–H12          | 107.87                   |                                    | N4–C9–H12           | 108.94     |
| C5–N4–H9            | 108.22                   | 107.527 (186), 107.334 (236)       |                     |            |
| N1–N4–H9            | 104.41                   | 109.223 (218)-107.363 (227)        |                     |            |

**Table S2.** The correlation diagram showing the correspondence between the optical modes in the LT (HT) phases of [DMHy]Mn(HCOO)<sub>3</sub>.

| Ion                     | Vibration                       | Free ion symmetry                                | Site symmetry                                                                               | Factor group symmetry LT (HT)                                                                                                                                |
|-------------------------|---------------------------------|--------------------------------------------------|---------------------------------------------------------------------------------------------|--------------------------------------------------------------------------------------------------------------------------------------------------------------|
| <b>Mn<sup>2+</sup></b>  | <b>T'</b>                       | -                                                | <b>C<sub>1</sub>=1 (C<sub>i</sub> = <math>\bar{1}</math>)</b><br><b>3A (3A<sub>u</sub>)</b> | <b>C<sub>2h</sub>=2/m (C<sub>2h</sub>=2/m)</b><br><b>3A<sub>g</sub> + 3A<sub>u</sub> + 3B<sub>g</sub> + 3B<sub>u</sub> (6A<sub>u</sub> + 6B<sub>u</sub>)</b> |
| <b>DMHy<sup>+</sup></b> |                                 | <b>C<sub>s</sub></b>                             | <b>C<sub>1</sub>=1</b>                                                                      | <b>C<sub>2h</sub>=2/m</b>                                                                                                                                    |
|                         | v <sub>s</sub> NH <sub>2</sub>  | A'                                               | A                                                                                           | A <sub>g</sub> + A <sub>u</sub> + B <sub>g</sub> + B <sub>u</sub>                                                                                            |
|                         | v <sub>as</sub> NH <sub>2</sub> | A''                                              | A                                                                                           | A <sub>g</sub> + A <sub>u</sub> + B <sub>g</sub> + B <sub>u</sub>                                                                                            |
|                         | δNH <sub>2</sub>                | A'                                               | A                                                                                           | A <sub>g</sub> + A <sub>u</sub> + B <sub>g</sub> + B <sub>u</sub>                                                                                            |
|                         | ρNH <sub>2</sub>                | A''                                              | A                                                                                           | A <sub>g</sub> + A <sub>u</sub> + B <sub>g</sub> + B <sub>u</sub>                                                                                            |
|                         | τNH <sub>2</sub>                | A''                                              | A                                                                                           | A <sub>g</sub> + A <sub>u</sub> + B <sub>g</sub> + B <sub>u</sub>                                                                                            |
|                         | ωNH <sub>2</sub>                | A'                                               | A                                                                                           | A <sub>g</sub> + A <sub>u</sub> + B <sub>g</sub> + B <sub>u</sub>                                                                                            |
|                         | vNH                             | A'                                               | A                                                                                           | A <sub>g</sub> + A <sub>u</sub> + B <sub>g</sub> + B <sub>u</sub>                                                                                            |
|                         | δNH                             | A'                                               | A                                                                                           | A <sub>g</sub> + A <sub>u</sub> + B <sub>g</sub> + B <sub>u</sub>                                                                                            |
|                         | γNH                             | A''                                              | A                                                                                           | A <sub>g</sub> + A <sub>u</sub> + B <sub>g</sub> + B <sub>u</sub>                                                                                            |
|                         | v <sub>s</sub> CH <sub>3</sub>  | A' + A''                                         | 2A                                                                                          | 2A <sub>g</sub> + 2A <sub>u</sub> + 2B <sub>g</sub> + 2B <sub>u</sub>                                                                                        |
|                         | v <sub>as</sub> CH <sub>3</sub> | 2A' + 2A''                                       | 4A                                                                                          | 4A <sub>g</sub> + 4A <sub>u</sub> + 4B <sub>g</sub> + 4B <sub>u</sub>                                                                                        |
|                         | δ <sub>s</sub> CH <sub>3</sub>  | A' + A''                                         | 2A                                                                                          | 2A <sub>g</sub> + 2A <sub>u</sub> + 2B <sub>g</sub> + 2B <sub>u</sub>                                                                                        |
|                         | δ <sub>as</sub> CH <sub>3</sub> | 2A' + 2A''                                       | 4A                                                                                          | 4A <sub>g</sub> + 4A <sub>u</sub> + 4B <sub>g</sub> + 4B <sub>u</sub>                                                                                        |
|                         | ρCH <sub>3</sub>                | 2A' + 2A''                                       | 4A                                                                                          | 4A <sub>g</sub> + 4A <sub>u</sub> + 4B <sub>g</sub> + 4B <sub>u</sub>                                                                                        |
|                         | τCH <sub>3</sub>                | A' + A''                                         | 2A                                                                                          | 2A <sub>g</sub> + 2A <sub>u</sub> + 2B <sub>g</sub> + 2B <sub>u</sub>                                                                                        |
|                         | vNN                             | A'                                               | A                                                                                           | A <sub>g</sub> + A <sub>u</sub> + B <sub>g</sub> + B <sub>u</sub>                                                                                            |
|                         | vCN                             | A' + A''                                         | 2A                                                                                          | 2A <sub>g</sub> + 2A <sub>u</sub> + 2B <sub>g</sub> + 2B <sub>u</sub>                                                                                        |
|                         | δCNN                            | A' + A''                                         | 2A                                                                                          | 2A <sub>g</sub> + 2A <sub>u</sub> + 2B <sub>g</sub> + 2B <sub>u</sub>                                                                                        |
|                         | δCNC                            | A'                                               | A                                                                                           | A <sub>g</sub> + A <sub>u</sub> + B <sub>g</sub> + B <sub>u</sub>                                                                                            |
|                         | T'                              | 2A' + A''                                        | 3A                                                                                          | 3A <sub>g</sub> + 3A <sub>u</sub> + 3B <sub>g</sub> + 3B <sub>u</sub>                                                                                        |
|                         | L                               | A' + 2A''                                        | 3A                                                                                          | 3A <sub>g</sub> + 3A <sub>u</sub> + 3B <sub>g</sub> + 3B <sub>u</sub>                                                                                        |
| <b>HCOO<sup>-</sup></b> |                                 | <b>C<sub>2v</sub>=mm2</b>                        | <b>C<sub>1</sub>=1</b>                                                                      | <b>C<sub>2h</sub>=2/m</b>                                                                                                                                    |
|                         | v <sub>1</sub>                  | A <sub>1</sub>                                   | 3A                                                                                          | 3A <sub>g</sub> + 3A <sub>u</sub> + 3B <sub>g</sub> + 3B <sub>u</sub>                                                                                        |
|                         | v <sub>2</sub>                  | A <sub>1</sub>                                   | 3A                                                                                          | 3A <sub>g</sub> + 3A <sub>u</sub> + 3B <sub>g</sub> + 3B <sub>u</sub>                                                                                        |
|                         | v <sub>3</sub>                  | A <sub>1</sub>                                   | 3A                                                                                          | 3A <sub>g</sub> + 3A <sub>u</sub> + 3B <sub>g</sub> + 3B <sub>u</sub>                                                                                        |
|                         | v <sub>4</sub>                  | B <sub>1</sub>                                   | 3A                                                                                          | 3A <sub>g</sub> + 3A <sub>u</sub> + 3B <sub>g</sub> + 3B <sub>u</sub>                                                                                        |
|                         | v <sub>5</sub>                  | B <sub>1</sub>                                   | 3A                                                                                          | 3A <sub>g</sub> + 3A <sub>u</sub> + 3B <sub>g</sub> + 3B <sub>u</sub>                                                                                        |
|                         | v <sub>6</sub>                  | B <sub>1</sub>                                   | 3A                                                                                          | 3A <sub>g</sub> + 3A <sub>u</sub> + 3B <sub>g</sub> + 3B <sub>u</sub>                                                                                        |
|                         | T'                              | A <sub>1</sub> + B <sub>1</sub> + B <sub>2</sub> | 9A                                                                                          | 9A <sub>g</sub> + 9A <sub>u</sub> + 9B <sub>g</sub> + 9B <sub>u</sub>                                                                                        |
|                         | L                               | A <sub>2</sub> + B <sub>1</sub> + B <sub>2</sub> | 9A                                                                                          | 9A <sub>g</sub> + 9A <sub>u</sub> + 9B <sub>g</sub> + 9B <sub>u</sub>                                                                                        |

Key: red: IR-active modes, blue: Raman-active modes, green: IR- and Raman-active modes.

**Table S3.** Calculated harmonic ( $\nu_h$ ) and anharmonic ( $\nu_{ah}$ ) wavenumbers for dimethylhydrazinium cation (DMHy<sup>+</sup>) and dimethylhydrazine molecule (DMHy) as well as potential energy distribution (PED) of the respective predominant modes.

| DMHy <sup>+</sup> Cation       |                               |                                   |                                                             | DMHy Molecule                  |                               |                                   |                                                      |
|--------------------------------|-------------------------------|-----------------------------------|-------------------------------------------------------------|--------------------------------|-------------------------------|-----------------------------------|------------------------------------------------------|
| $\nu_h$<br>(cm <sup>-1</sup> ) | $\nu_h^*$ (cm <sup>-1</sup> ) | $\nu_{ah}$<br>(cm <sup>-1</sup> ) | PED (%)                                                     | $\nu_h$<br>(cm <sup>-1</sup> ) | $\nu_h^*$ (cm <sup>-1</sup> ) | $\nu_{ah}$<br>(cm <sup>-1</sup> ) | PED (%)                                              |
| 3556                           | 3414                          | 3389                              | $\nu_{as}NH_2$ -100                                         | 3532                           | 3391                          | 3344                              | $\nu_{as}NH_2$ -100                                  |
| 3470                           | 3331                          | 3363                              | $\nu_sNH_2$ -98                                             | 3345                           | 3211                          | 3148                              | $\nu_sNH_2$ -100                                     |
| 3445                           | 3307                          | 3288                              | $\nu NH^+$ -95                                              |                                |                               |                                   |                                                      |
| 3190                           | 3062                          | 3047                              | $\nu_{as}CH_3$ -100                                         | 3129                           | 3004                          | 2984                              | $\nu_{as}CH_3$ -100                                  |
| 3174                           | 3047                          | 3030                              | $\nu_{as}CH_3$ -99                                          | 3099                           | 2975                          | 2946                              | $\nu_{as}CH_3$ -99                                   |
| 3172                           | 3045                          | 3028                              | $\nu_{as}CH_3$ -100                                         | 3071                           | 2948                          | 2946                              | $\nu_{as}CH_3$ -100                                  |
| 3165                           | 3038                          | 3022                              | $\nu_{as}CH_3$ -100                                         | 3059                           | 2937                          | 2933                              | $\nu_{as}CH_3$ -99                                   |
| 3083                           | 2960                          | 2983                              | $\nu_sCH_3$ -100                                            | 2920                           | 2803                          | 2746                              | $\nu_sCH_3$ -99                                      |
| 3074                           | 2951                          | 2971                              | $\nu_sCH_3$ -100                                            | 2905                           | 2846                          | 2723                              | $\nu_sCH_3$ -99                                      |
| 1685                           | 1651                          | 1658                              | $\delta NH_2$ -99                                           | 1670                           | 1637                          | 1612                              | $\delta NH_2$ -99                                    |
| 1515                           | 1484                          | 1467                              | $\delta_{as}CH_3$ -70 + $\rho NH_2$ -14 + $\delta NH^+$ -13 | 1513                           | 1482                          | 1468                              | $\delta_{as}CH_3$ -98                                |
| 1512                           | 1482                          | 1464                              | $\delta_{as}CH_3$ -85                                       | 1497                           | 1467                          | 1462                              | $\delta_{as}CH_3$ -98                                |
| 1497                           | 1467                          | 1462                              | $\delta_{as}CH_3$ -66 + $\delta NH^+$ -24                   |                                |                               |                                   |                                                      |
| 1492                           | 1462                          | 1442                              | $\delta_{as}CH_3$ -79 + $\delta NH^+$ -16                   | 1495                           | 1466                          | 1449                              | $\delta_{as}CH_3$ -98                                |
| 1481                           | 1451                          | 1442                              | $\delta_{as}CH_3$ -79 + $\delta NH^+$ -16                   | 1483                           | 1453                          | 1448                              | $\delta_{as}CH_3$ -99                                |
| 1473                           | 1444                          | 1438                              | $\delta_sCH_3$ -96                                          | 1463                           | 1434                          | 1422                              | $\delta_sCH_3$ -98                                   |
| 1452                           | 1422                          | 1419                              | $\delta_sCH_3$ -89 + $\gamma NH^+$ -11                      | 1439                           | 1410                          | 1414                              | $\delta_sCH_3$ -100                                  |
| 1424                           | 1396                          | 1374                              | $\gamma NH^+$ -66 + $\delta_sCH_3$ -34                      |                                |                               |                                   |                                                      |
| 1359                           | 1332                          | 1321                              | $\rho CH_3$ -43 + $\rho NH_2$ -40 + $\delta NH^+$ -16       | 1340                           | 1314                          | 1296                              | $\rho NH_2$ -77 + $\nu CN$ -17                       |
| 1255                           | 1230                          | 1212                              | $\rho CH_3$ -81 + $\nu NN$ -10                              | 1284                           | 1258                          | 1245                              | $\rho CH_3$ -71 + $\rho NH_2$ -29                    |
| 1218                           | 1194                          | 1178                              | $\rho CH_3$ -71 + $\omega NH_2$ -17                         | 1241                           | 1217                          | 1202                              | $\rho CH_3$ -47 + $\omega NH_2$ -47                  |
| 1138                           | 1116                          | 1112                              | $\rho CH_3$ -74 + $\rho NH_2$ -19                           | 1167                           | 1144                          | 1137                              | $\rho CH_3$ -81 + $\rho NH_2$ -11                    |
| 1060                           | 1039                          | 1026                              | $\rho CH_3$ -48 + $\omega NH_2$ -45                         | 1115                           | 1093                          | 1087                              | $\rho CH_3$ -98                                      |
| 1050                           | 1029                          | 1025                              | $\rho CH_3$ -67 + $\omega NH_2$ -22 + $\gamma NH^+$ -10     | 1080                           | 1058                          | 1046                              | $\rho CH_3$ -50 + $\omega NH_2$ -30 + $\nu NN$ -20   |
| 958                            | 938                           | 923                               | $\nu CN$ -95                                                | 1029                           | 1008                          | 1005                              | $\rho CH_3$ -53 + $\nu_{as}CNC$ -45                  |
| 915                            | 897                           | 867                               | $\nu NN$ -41 + $\nu CN$ -31 + $\omega NH_2$ -26             | 950                            | 931                           | 898                               | $\omega NH_2$ -49 + $\nu_{as}CNC$ -28 + $\nu NN$ -19 |
| 793                            | 777                           | 766                               | $\nu CN$ -64 + $\nu NN$ -30                                 | 816                            | 799                           | 788                               | $\nu NN$ -44 + $\nu_sCNC$ -58                        |
| 475                            | 466                           | 467                               | $\delta CNN$ -89                                            | 464                            | 455                           | 454                               | $\delta CNC$ -96                                     |
| 426                            | 417                           | 425                               | $\delta CNN$ -90                                            | 428                            | 420                           | 429                               | $\delta CNC$ -99                                     |
| 391                            | 384                           | 364                               | $\delta CNC$ -63 + $\delta CNN$ -27                         | 399                            | 391                           | 371                               | $\delta CNN$ -72 + $\delta CNC$ -27                  |
| 264                            | 259                           | 231                               | $\tau CH_3$ -99                                             | 300                            | 294                           | 318                               | $\tau NH_2$ -98                                      |
| 262                            | 257                           | 216                               | $\tau NH_2$ -99                                             | 273                            | 268                           | 299                               | $\tau CH_3$ -100                                     |
| 216                            | 212                           | 200                               | $\tau CH_3$ -100                                            | 247                            | 242                           | 287                               | $\tau CH_3$ -98                                      |

\* scaling factor, 0.9800 (0-2499 cm<sup>-1</sup>), 0.96 (2500-3600 cm<sup>-1</sup>); key:  $\nu$ , stretching;  $\delta$ , bending;  $\rho$ , rocking;  $\gamma$ , out-of-plane bending;  $\omega$ , wagging;  $\tau$ , twisting

**Table S4.** The comparison of IR (polycrystalline) and Raman (single crystal) bands observed at 80 and 300 K for [DMHy]Mn(HCOO)<sub>3</sub>.

| Raman (80 K)                                              | Raman (300 K)                | IR (80 K)                                                                      | IR (300 K)                                                     | Assignment                     |
|-----------------------------------------------------------|------------------------------|--------------------------------------------------------------------------------|----------------------------------------------------------------|--------------------------------|
| 3307sh, 3272vw                                            | 3320sh, 3286vw               | 3352vw, 3314w, 3262m, 3227sh                                                   | 3312w, 3283w                                                   | $\nu_{as}NH_2$                 |
| 3156w                                                     | 3176vw                       | 3195vw, 3161m, 3135w                                                           | 3171w                                                          | $\nu_sNH_2$                    |
| 3062w, 3039sh, 3036m                                      | 3055sh, 3044w                | 3074vw, 3057vw, 3046vw                                                         | 3054sh, 3039sh                                                 | $\nu NH^+$                     |
| 3018m                                                     | 3025m                        | 3035sh, 3021w                                                                  | 3025w                                                          | $\nu_{as}CH_3$                 |
| 2974m, 2958sh, 2948m, 2909sh                              | 2974sh, 2964m, 2950sh, 2928m | 2987w <sup>a</sup> , 2947w <sup>a</sup> , 2931w <sup>a</sup>                   | 2953sh <sup>a</sup> , 2931w <sup>a</sup>                       | $\nu_sCH_3$                    |
| 2873s, 2852m, 2835s                                       | 2856w, 2827m                 | 2863w <sup>a</sup> , 2854sh <sup>a</sup> , 2844w, 2824w <sup>a</sup>           | 2858sh <sup>a</sup> , 2843sh <sup>a</sup> , 2826w <sup>a</sup> | $\nu_1$                        |
| 2795w, 2724vw, 2703w, 2690vw                              | 2710vw, 2692vw               | 2778vw, 2740w, 2716w, 2670w, 2648m, 2628m, 2602sh, 2584sh, 2550w, 2531w, 2504w | 2730sh, 2715w, 2674w, 2639sh, 2540vw, 2495vw                   | $\nu NH_2 + \nu NH^+ + o + cb$ |
| 1648vw                                                    | 1654vw                       | 1661w                                                                          | 1648sh                                                         | $\delta NH_2$                  |
| 1583vw                                                    | 1576vw                       | 1575vs, 1536sh, 1510m                                                          | 1581vs                                                         | $\nu_4 + \delta NH^+$          |
| 1503vw, 1481sh, 1469w, 1459w                              | 1482sh, 1469vw               | *                                                                              | *                                                              | $\delta_{as}CH_3$              |
| 1440vw, 1401vw                                            | 1434vw, 1410vw               | *                                                                              | *                                                              | $\delta_sCH_3 + \gamma NH^+$   |
| 1372sh, 1366s, 1359vs                                     | 1371sh, 1360s,               | *                                                                              | *                                                              | $\nu_5$                        |
| 1349m, 1340vw                                             | 1353sh                       | *                                                                              | *                                                              | $\nu_2 + \rho NH_2$            |
| 1243vw, 1220w, 1149w                                      | 1243vw, 1217vw, 1143vw       | 1247w, 1224w, 1197vw, 1176w, 1151vw                                            | 1244w, 1216w, 1200w, 1171vw                                    | $\rho CH_3$                    |
| 1084sh, 1077w                                             | 1097vw                       | 1100w, 1081w                                                                   | 1093w                                                          | $\rho CH_3 + \nu NN$           |
| 1063w, 1057sh                                             | 1065w, 1058sh                | 1067w 1059sh                                                                   | 1058w                                                          | $\nu_6$                        |
|                                                           |                              | 994 w, 989 w                                                                   | 1002 w, 990 vw                                                 | $\nu_{as}CNC$                  |
| 962w                                                      | 949vw                        | 966w, 941w                                                                     | 958w, 946w                                                     | $\omega NH_2$                  |
| 839vw, 822m                                               | 833vw, 824w                  | 825w                                                                           | 820vw                                                          | $\nu_sCNN$                     |
| 790w                                                      | 788wm                        | 800sh, 795s, 767sh                                                             | 792s                                                           | $\nu_3$                        |
| 516vw, 489vw                                              | 507vw                        |                                                                                |                                                                | $\delta CNC$                   |
| 449 vw, 419 vw                                            | 443 vw, 420 vw               |                                                                                |                                                                | $\delta CNN$                   |
| 301vw, 290vw, 251vw, 226w, 208w                           | 314vw, 210sh, 203sh          |                                                                                |                                                                | $\tau NH_2 + \tau CH_3 + lm$   |
| 187sh, 181w, 174sh, 157w, 148w, 136w, 119w, 98w, 85w, 72w | 179w, 133w, 75sh, 60w        |                                                                                |                                                                | lm                             |

Key:  $\nu$ , stretching;  $\delta$ , bending;  $\rho$ , rocking;  $\gamma$ , out-of-plane bending;  $\omega$ , wagging;  $\tau$ , twisting; vs, very strong; s, strong; m, medium; w, weak; vw, very weak;  $\nu_1$ – $\nu_6$ , internal vibrations of formate ion (see description in text); \*, regions of absorption related to the medium; o, overtones; cb, combinational bands; lm, lattice modes; <sup>a</sup> in Fluorolube.

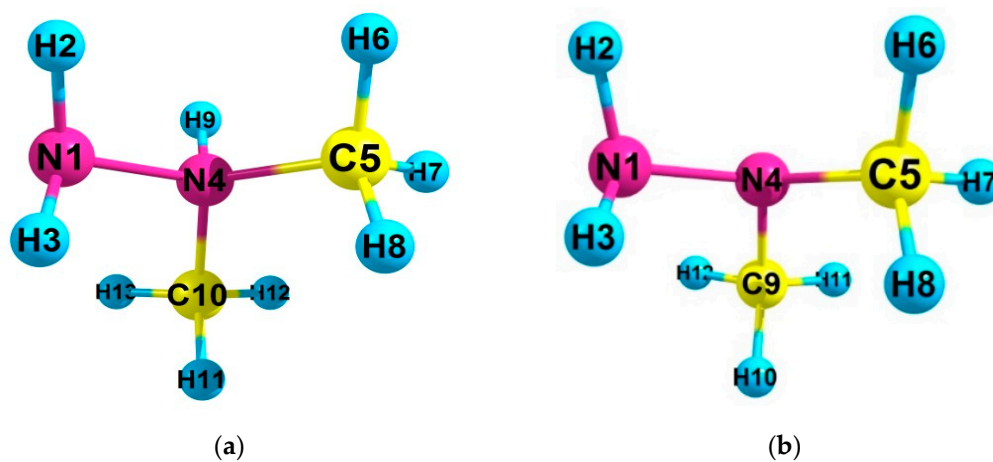

**Figure S1.** The numbering of atoms in the (a) dimethylhydrazinium cation (DMHy<sup>+</sup>) and (b) dimethylhydrazine molecule (DMHy).

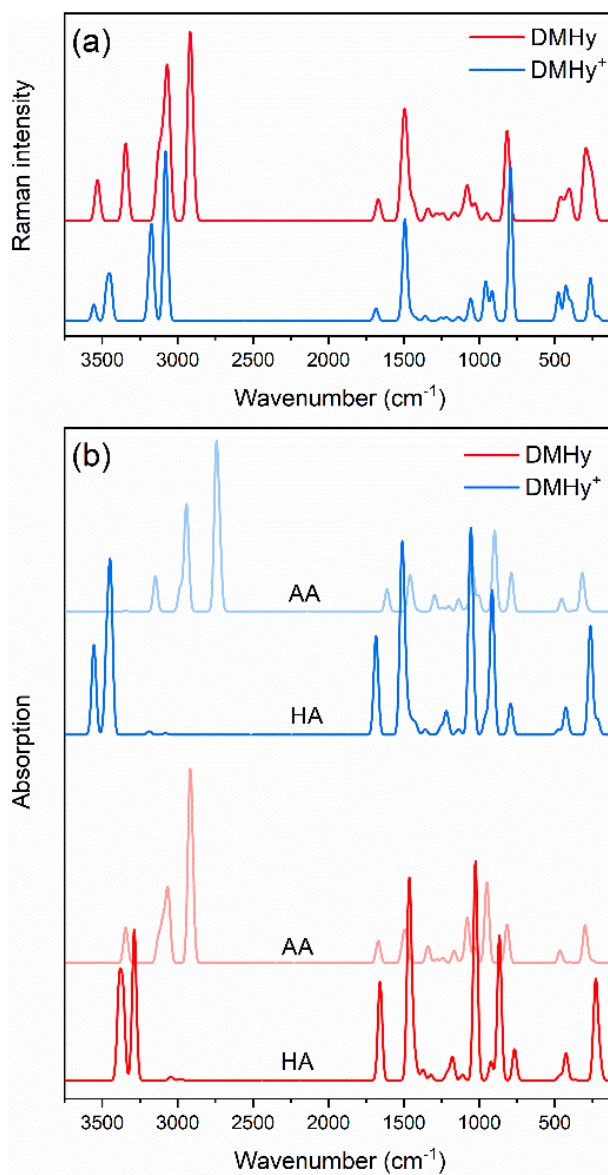

**Figure S2.** The comparison of calculated Raman spectra (a) in harmonic approximation and IR spectra (b) of dimethylhydrazinium cation ( $\text{DMHy}^+$ ) and dimethylhydrazine molecule ( $\text{DMHy}$ ) in the harmonic (HA) and anharmonic approximation (AA).

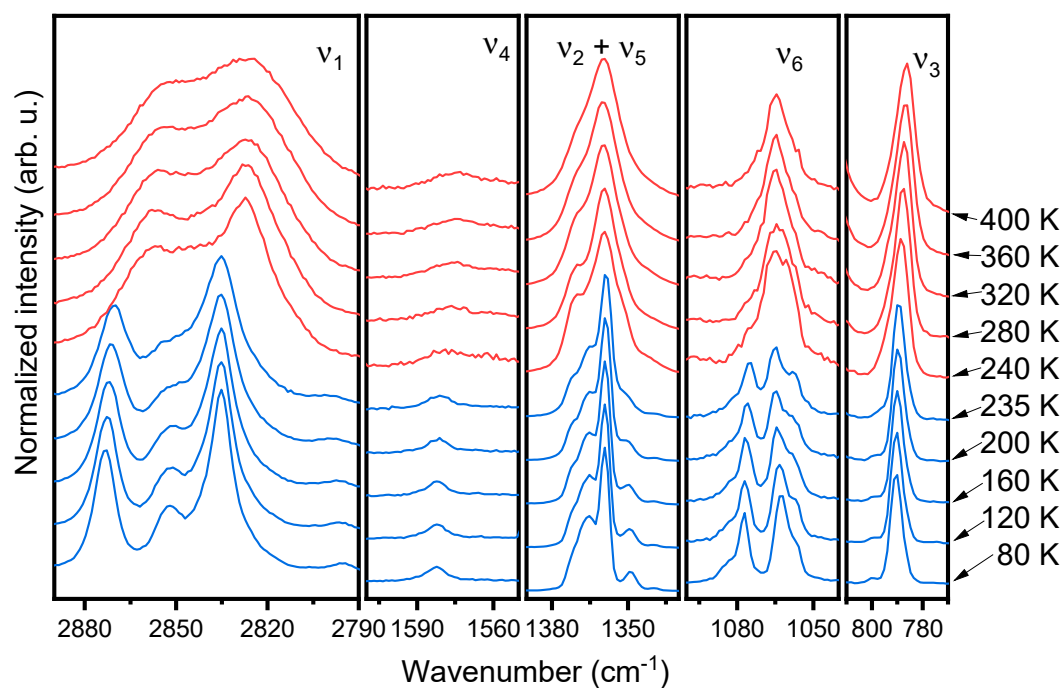

**Figure S3.** Raman bands corresponding to vibrational modes of the formate anion.

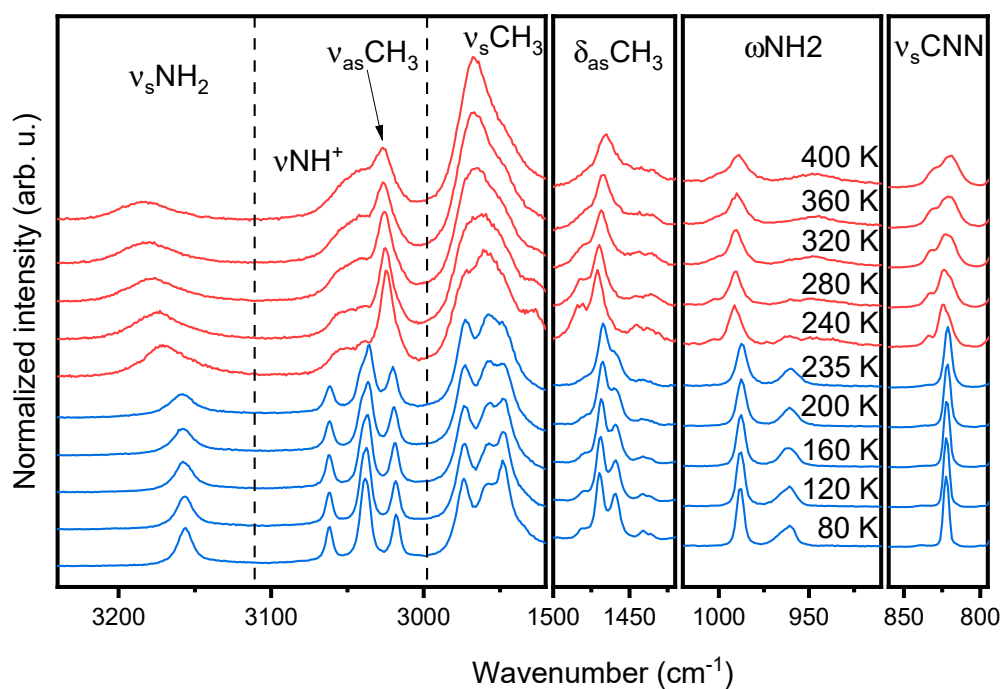

**Figure S4.** Details of temperature-dependent Raman spectra, corresponding to vibrational modes of  $\text{DMHy}^+$  cation.

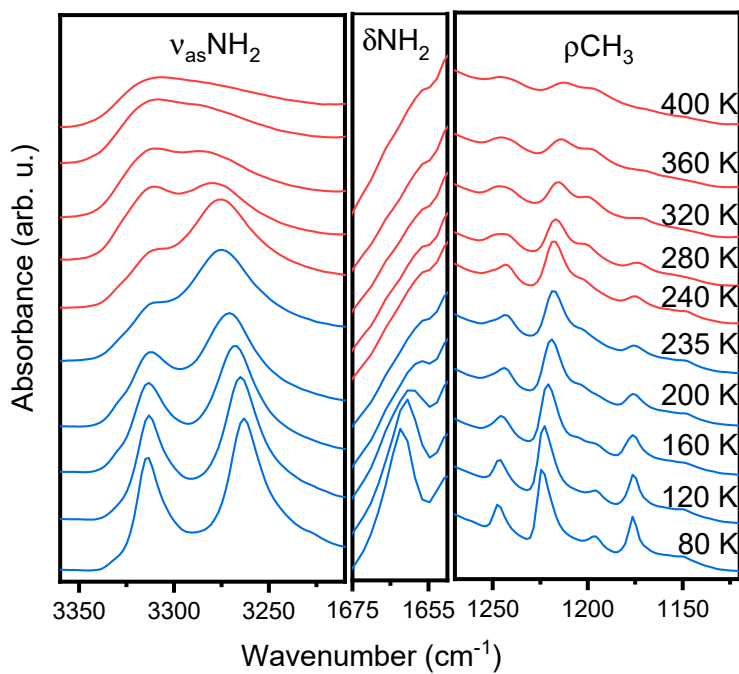

**Figure S5.** Details of temperature-dependent IR spectra, corresponding to vibrational modes of DMHy<sup>+</sup> cation.

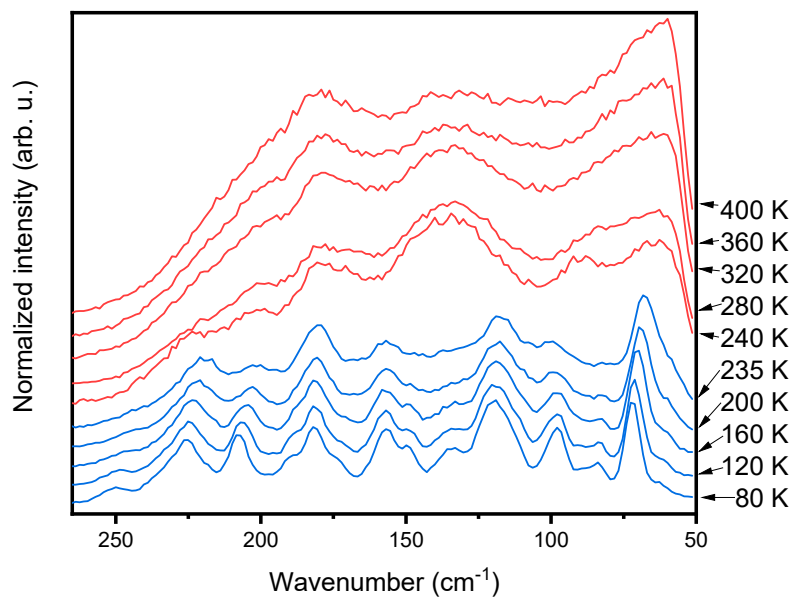

**Figure S6.** Raman bands corresponding to lattice modes.

## Reference

1. Zienkiewicz, J.A.; Kowalska, D.A.; Fedoruk, K.; Stefański, M.; Pikul, A.; Ptak, M. Unusual isosymmetric order-disorder phase transition in the new perovskite-type dimethylhydrazinium manganese formate exhibiting ferrimagnetic and photoluminescent properties. *J. Mater. Chem. C* **2021**, *9*, 6841–6851, <https://doi.org/10.1039/D1TC01014J>
